# Supplementary material for: A Customized Microfluidic Paper-Based Platform for Colorimetric Immunosensing: Demonstrated via hCG Assay for Pregnancy Test
Source: MDPI journal article supplement (doi:10.3390/bios11120474), 2021-11-25
Supplement: s1 [file s1]

Supplementary Materials

# A Customized Microfluidic Paper-Based Platform for Colorimetric Immunosensing: Demonstrated *via* hCG Assay for Pregnancy Test

Mohammad Rahbar <sup>1</sup>, Siyi Zou <sup>2</sup>, Mahroo Baharfar <sup>1</sup> and Guozhen Liu <sup>1,2,\*</sup>

<sup>1</sup> Graduate School of Biomedical Engineering, The University of New South Wales, Sydney NSW, 2052, Australia

<sup>2</sup> School of Life and Health Sciences, The Chinese University of Hong Kong, Shenzhen, 518172, China

\* Correspondence: liuguozhen@cuhk.edu.cn

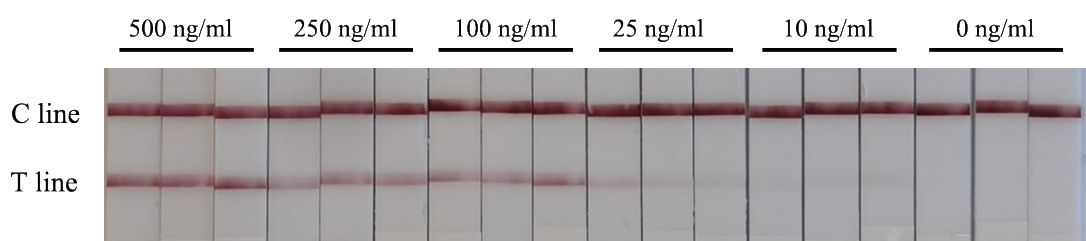

**Figure S1.** Images of commercial test strips for detection of hCG in different concentrations (n = 3).

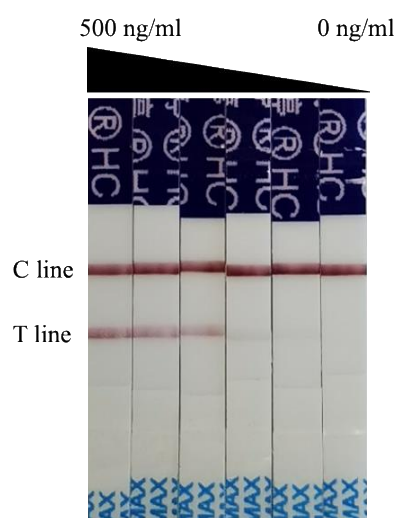

**Figure S2.** Images of commercial test strips for detection of hCG in the concentration of 0 ng/mL and 500 ng/mL, respectively.

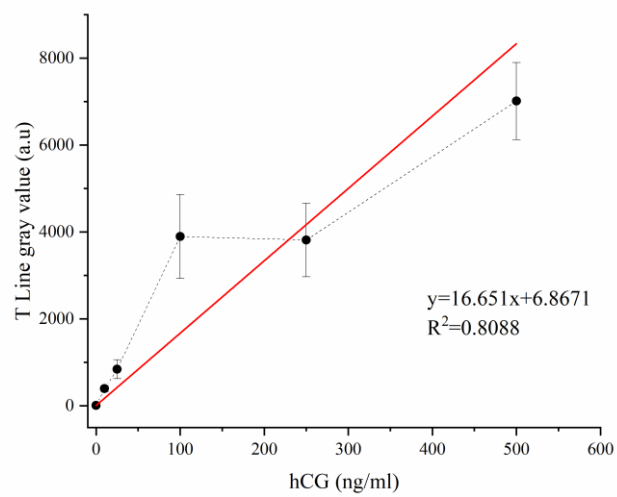

**Figure S3.** A calibration curve drawn of T line gray values in the range of 0 to 500 ng/mL.

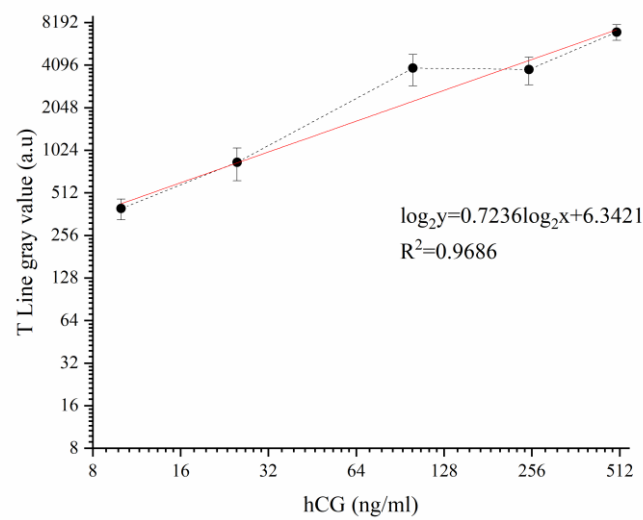

**Figure S4.** A calibration curve X&Y axis were calculated by double logarithmic coordinates.
